# Supplementary material for: Anesthetic Propofol Promotes Tumor Metastasis in Lungs via GABAAR‐Dependent TRIM21 Modulation of Src Expression
Source: PubMed Central journal article supplement (PMC8456212; doi:10.1002/advs.202102079), 2021-07-15
Supplement: ADVS-8-2102079-s001.pdf [file ADVS-8-2102079-s001.pdf]

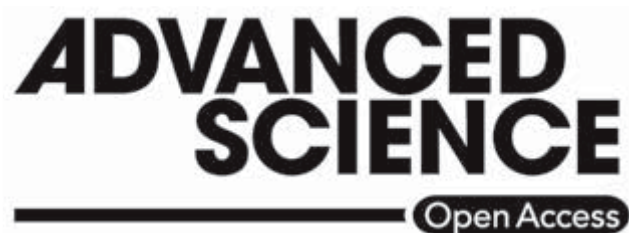

## Supporting Information

for *Adv. Sci.*, DOI: 10.1002/adv.202102079

### **Anesthetic propofol promotes tumor metastasis in lungs via GABA<sub>A</sub>R-dependent TRIM21 modulation of Src expression**

*Qidong Liu, Zhihao Sheng, Chun Cheng, Hui Zheng, Michael Lanuti, Rong Liu, Ping Wang, Yuan Shen\* and Zhongcong Xie\**

## **Supporting Information**

### **Anesthetic propofol promotes tumor metastasis in lungs via GABA<sub>A</sub>R-dependent TRIM21 modulation of Src expression**

Qidong Liu, Zhihao Sheng, Chun Cheng, Hui Zheng,  
Michael Lanuti, Rong Liu, Ping Wang, Yuan Shen and Zhongcong Xie

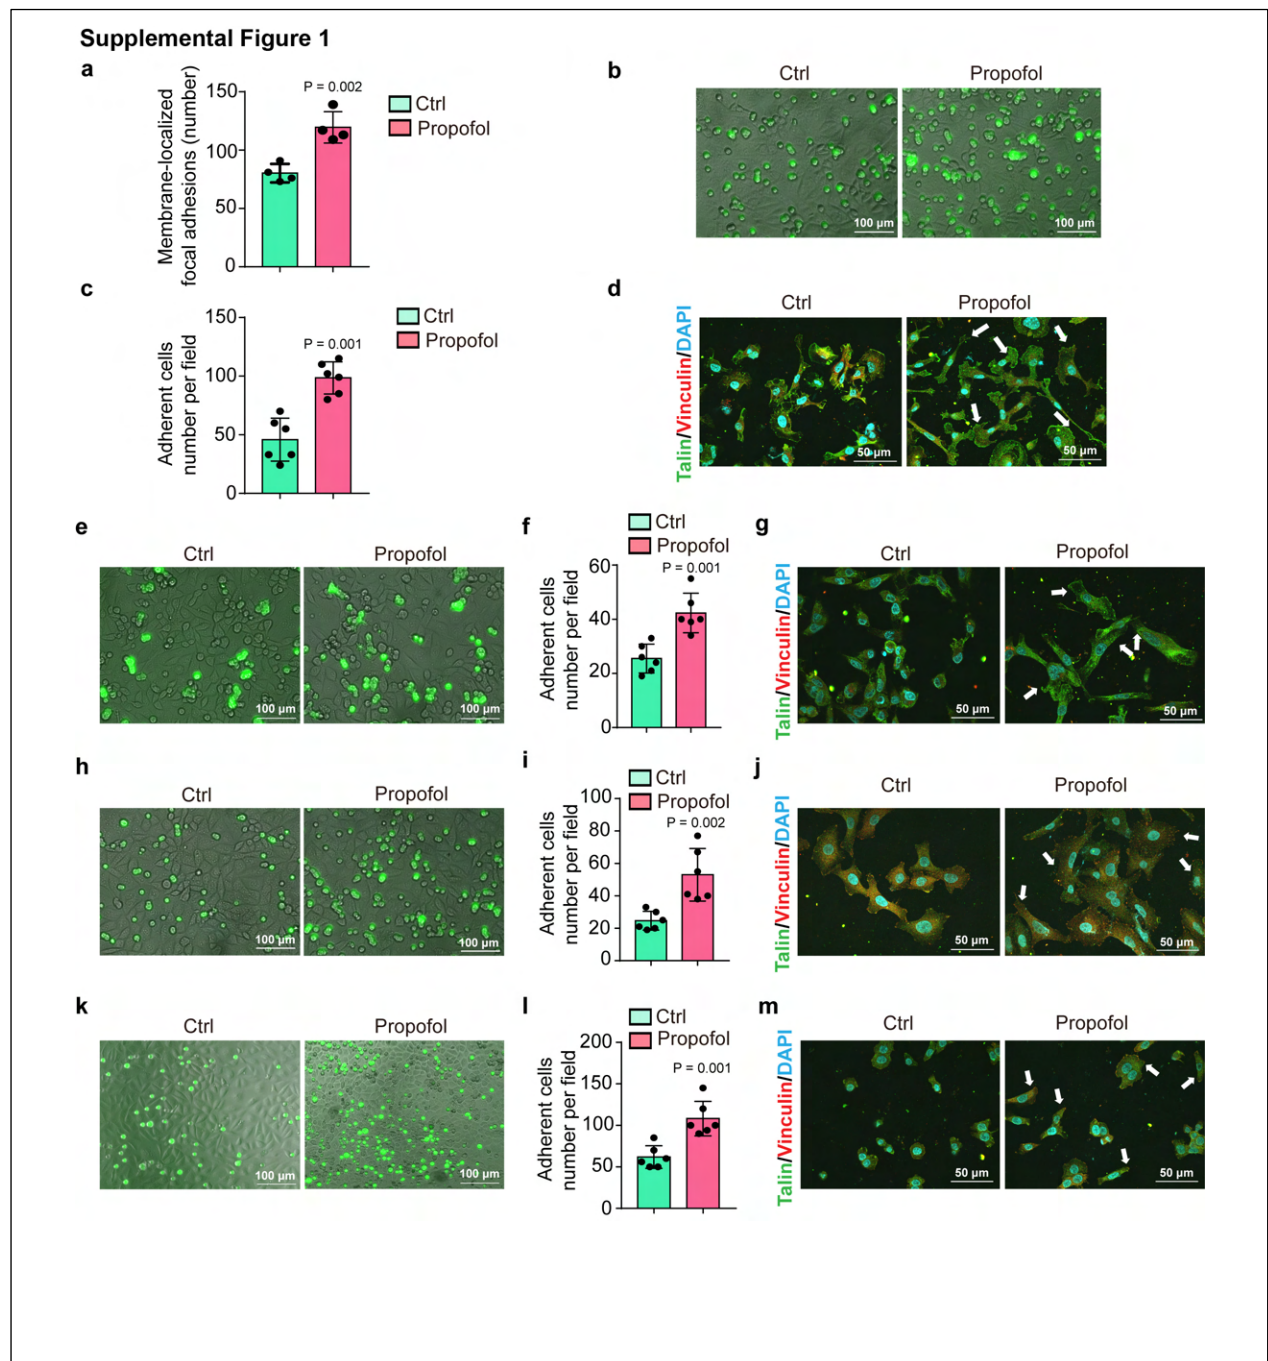

**Supplemental Figure 1. Propofol enhances adhesion and extension of tumor cells.**

**a.** Quantification of the membrane-localized Talin and Vinculin in focal adhesions in HCT116 cells treated with propofol or control condition ( $N = 4$ , mean  $\pm$  SD, Student's t-test,  $P = 0.002$ ), Ctrl, control. Fluorescent micrographs and immunofluorescent staining of Talin and Vinculin show adhesion of HUVEC monolayer with the propofol-treated CT26 (**b, c, d**), MDA-MB-231 (**e, f, g**), A549 (**h, i, j**), Ishikawa (**k, l, m**) and control cells (scale bar = 50  $\mu\text{m}$  or 100  $\mu\text{m}$ ). Arrows indicate focal adhesions. Ctrl, control; HUVEC, human umbilical vein endothelial cell; SD, standard deviation.

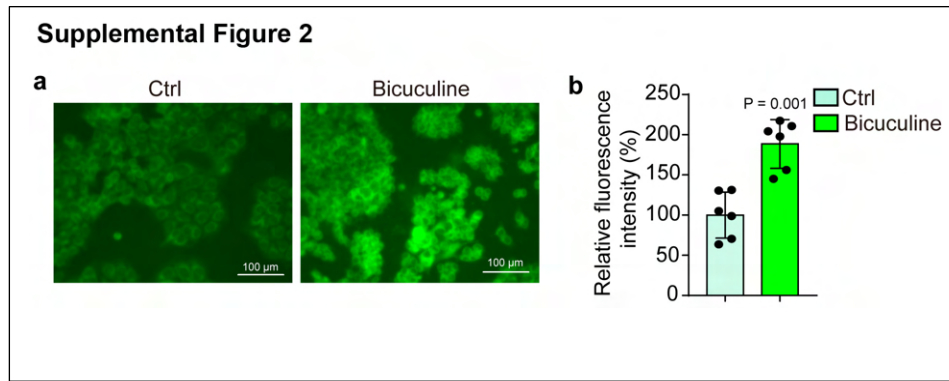

**Supplemental Figure 2. GABA<sub>A</sub>R antagonist bicuculine induces depolarization of membrane potential in HCT116 cells.**

**a.** Fluorescent micrographs of DiBAC4(3)-dyed HCT116 cells treated with control condition or GABA<sub>A</sub>R antagonist (bicuculine, 250 μM) (scale bar = 100 μm). **b.** The relative quantification of fluorescence intensity was determined (N = 6, mean ± SD, Student's t-test, P = 0.001). Ctrl, control; SD, standard deviation.

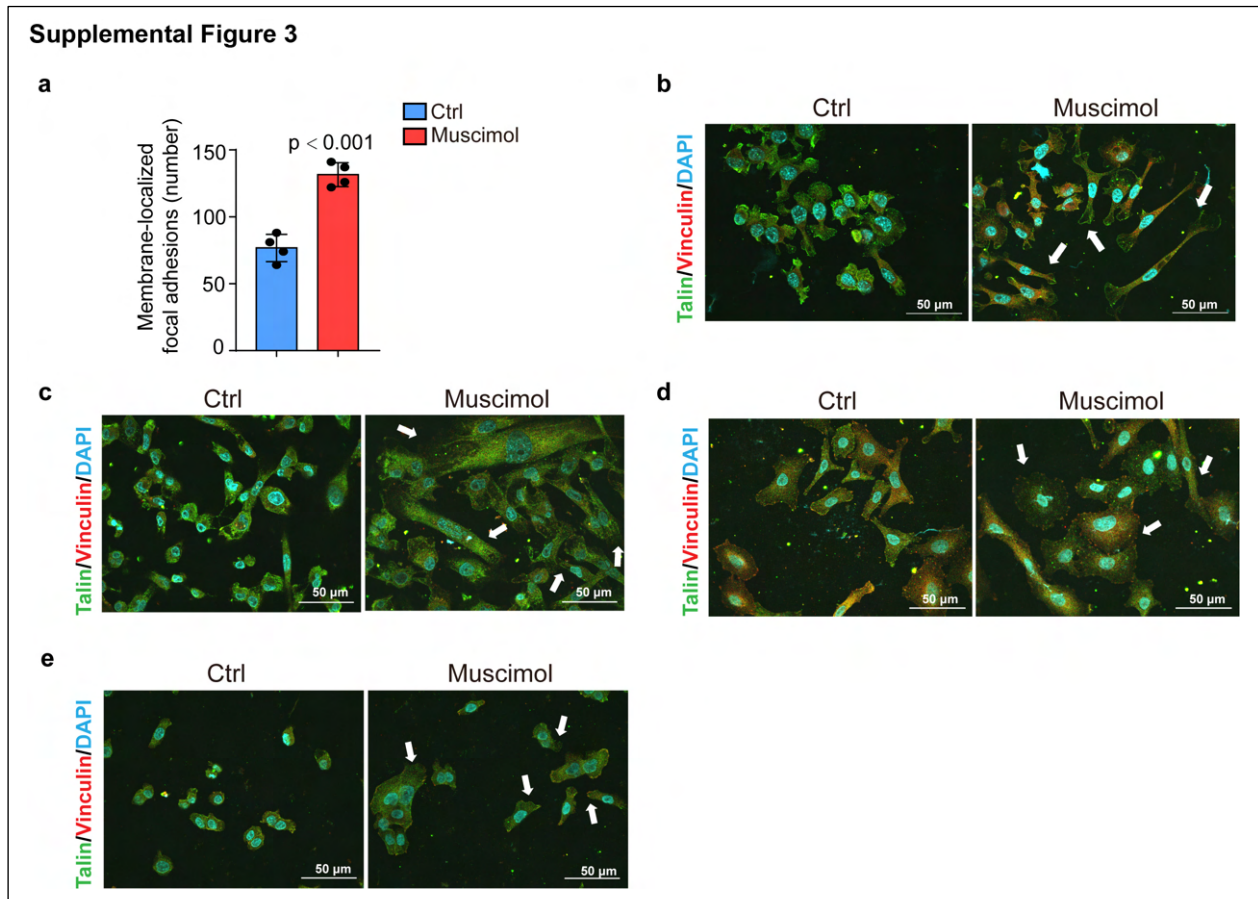

**Supplemental Figure 3. GABA<sub>A</sub>R agonist muscimol promotes tumor cells adhesion and extension.**

**a.** Quantification of the membrane-localized Talin and Vinculin in focal adhesions in HCT116 cells treated with muscimol or control (N = 4, mean  $\pm$  SD, Student's t-test, P < 0.001). Immunofluorescence staining of Talin and Vinculin in muscimol-treated CT26 (**b**), MDA-MB-231 (**c**), A549 (**d**), and Ishikawa (**e**) cells compared to controls (scale bar = 50  $\mu\text{m}$ ). Arrows indicate focal adhesions. Ctrl, control; SD, standard deviation.

**Supplemental Figure 4**

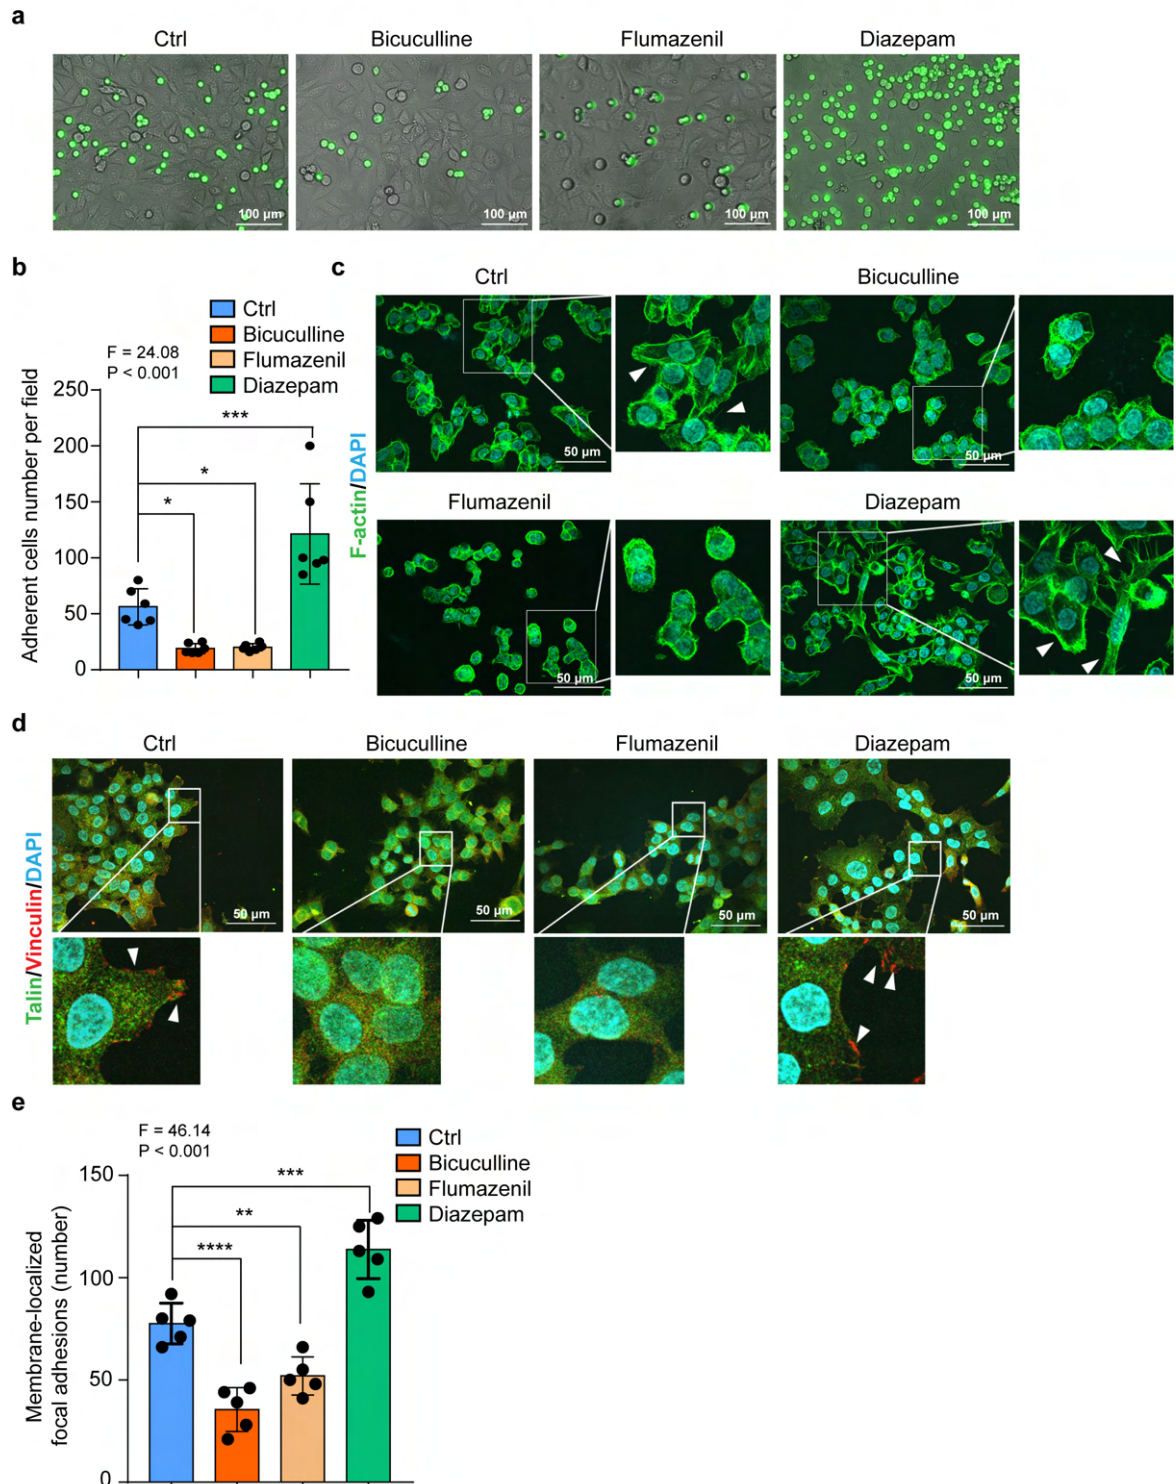

**Supplemental Figure 4. GABA<sub>A</sub>R contributes to the regulation of HCT116 cells adhesion and extension.**

**a.** Fluorescent micrographs showing adhesion between the HUVEC monolayer and the HCT116 cells (green) treated with GABA<sub>A</sub>R antagonist bicuculline, benzodiazepine antagonist flumazenil, or benzodiazepine agonist diazepam (scale bar = 100 μm). **b.** Quantification of the

adhesion between the HUVEC monolayer and the HCT116 cells under static conditions in each group (N = 6, mean  $\pm$  SD, One-way ANOVA test with post-hoc Bonferroni test, F = 24.08, P < 0.001). **c.** F-actin labeling of membrane protrusions in HCT116 cells treated with bicuculine, flumazenil, or diazepam compared to controls (F-actin: phalloidin; nucleus: DAPI; scale bar = 50  $\mu$ m). Arrows indicate extensions of cell membrane protrusions. **d.** Immunofluorescence staining of Talin and Vinculin in HCT116 cells treated with bicuculine, flumazenil, or diazepam compared to controls. (scale bar = 50  $\mu$ m). Arrows indicate focal adhesions. Ctrl, control. **e.** Quantification of the membrane-localized Talin and Vinculin in focal adhesions in **d** (N = 5, mean  $\pm$  SD, One-way ANOVA test with post-hoc Bonferroni test, F = 46.14, P < 0.001). Ctrl, control; HUVEC, human umbilical vein endothelial cell; SD, standard deviation. \* P < 0.05, \*\* P < 0.01, \*\*\* P < 0.001, \*\*\*\* P < 0.0001.

### Supplemental Figure 5

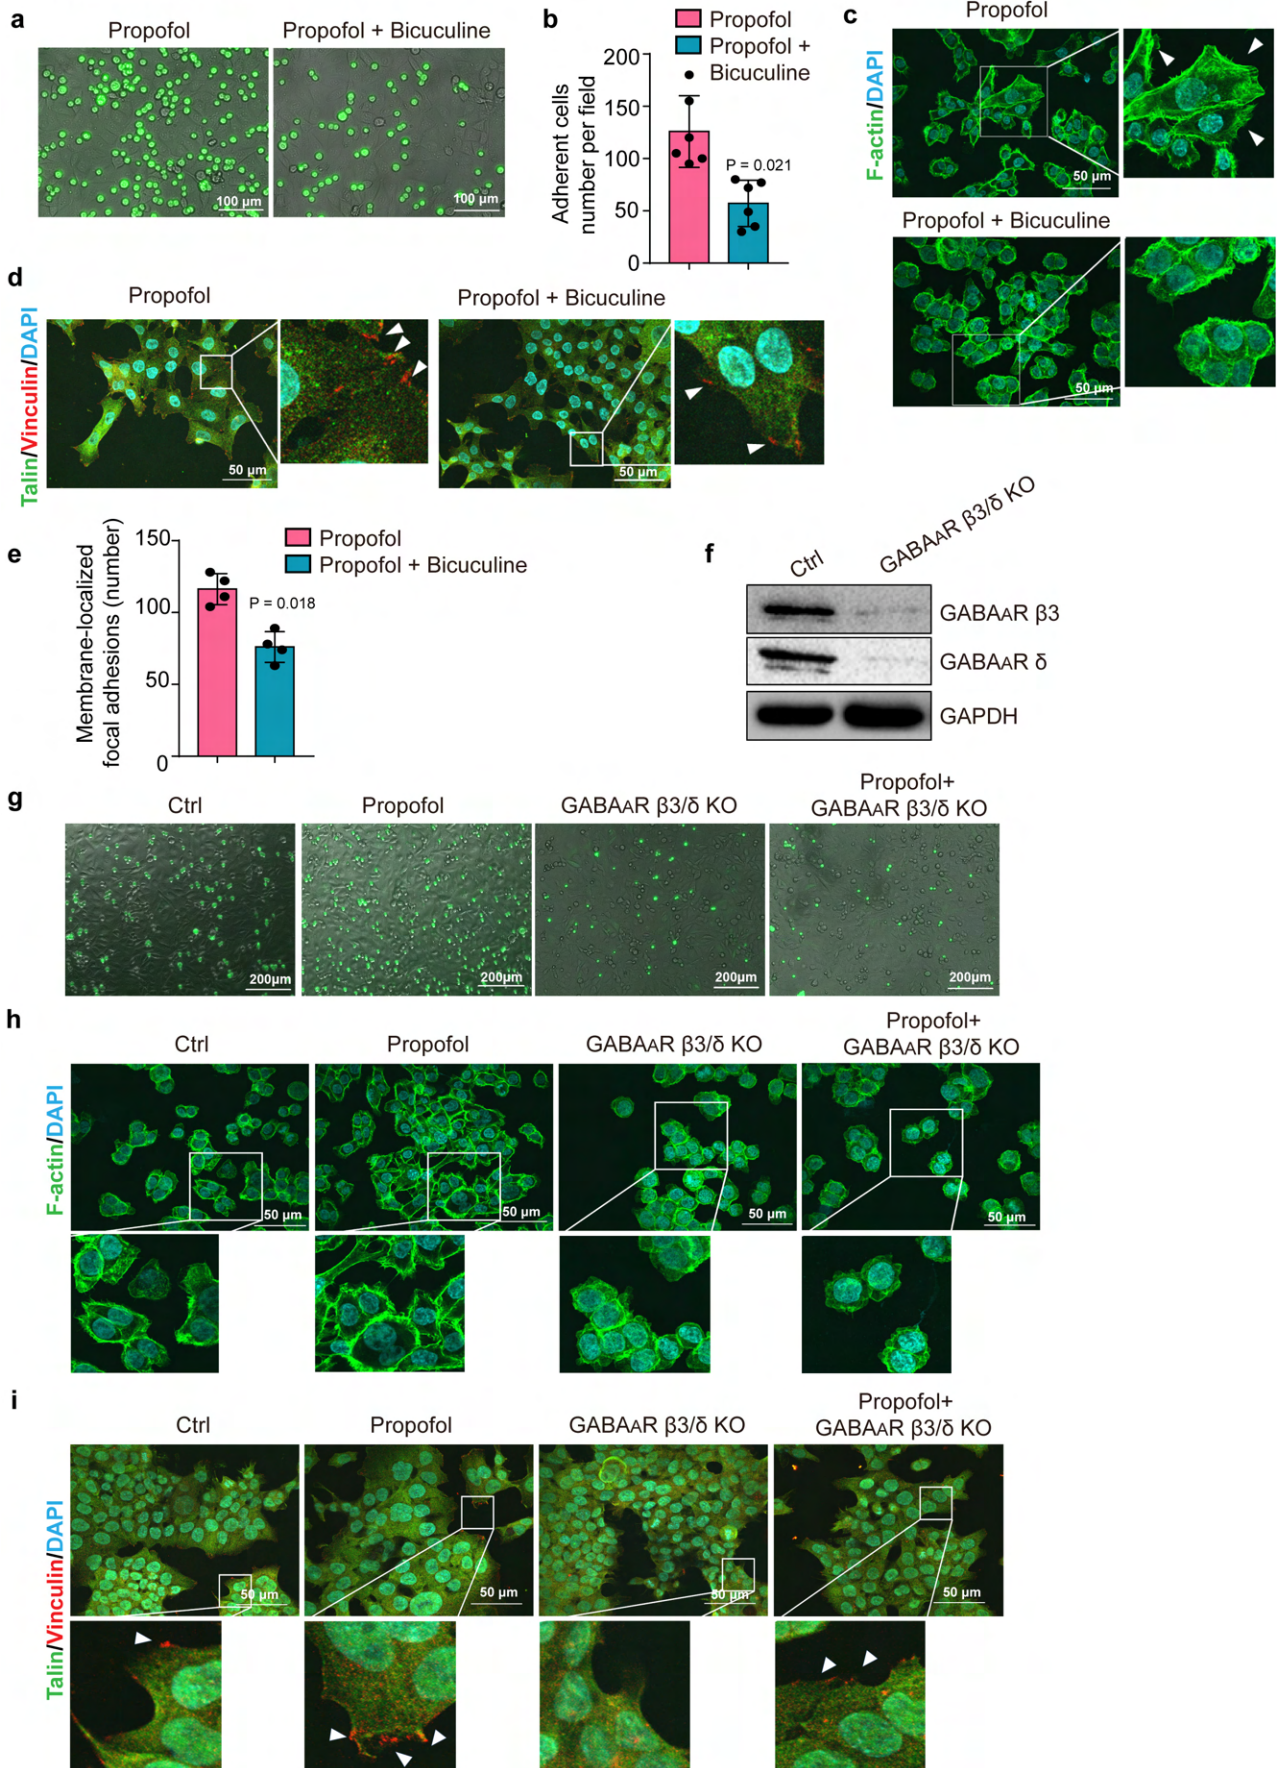



**Supplemental Figure 5. Inhibition of GABA<sub>A</sub>R attenuates the propofol-induced enhancement of tumor cells adhesion and extension.**

**a.** Fluorescent micrographs showing adhesion between the HUVEC monolayer and the propofol-treated HCT116 cells (green) with or without GABA<sub>A</sub>R antagonist bicuculine (scale bar = 100 μm). **b.** Quantification of the adhesion between HCT116 cells and HUVEC monolayer (N = 6, mean ± SD, Student's t-test, P = 0.021). **c.** F-actin labeling of membrane protrusions in propofol-treated HCT116 cells with or without GABA<sub>A</sub>R antagonist bicuculine (scale bar = 100 μm). Arrows indicate extensions of cell membrane protrusions. **d.** Immunofluorescence staining of Talin and Vinculin in the propofol-treated HCT116 cells with or without GABA<sub>A</sub>R antagonist bicuculine (scale bar = 50 μm). Arrows indicate focal adhesions. Ctrl, control. **e.** Quantification of the membrane-localized Talin and Vinculin in focal adhesions in (d) (N = 4, mean ± SD, Student's t-test, P = 0.018). **f.** Western blot showing the knockout of both of GABA<sub>A</sub>R subunit β3 and δ. **g.** Fluorescent micrographs showed that knockout of GABA<sub>A</sub>R blocked the adhesion of HCT116 cells (green) to the HUVEC monolayer (scale bar = 200 μm). **h.** F-actin labeling of membrane protrusions (scale bar = 50 μm). **i.** Immunofluorescence staining of Talin and Vinculin of focal adhesions (scale bar = 50 μm). Arrows indicate focal adhesions. Ctrl, control; HUVEC, human umbilical vein endothelial cell; SD, standard deviation.

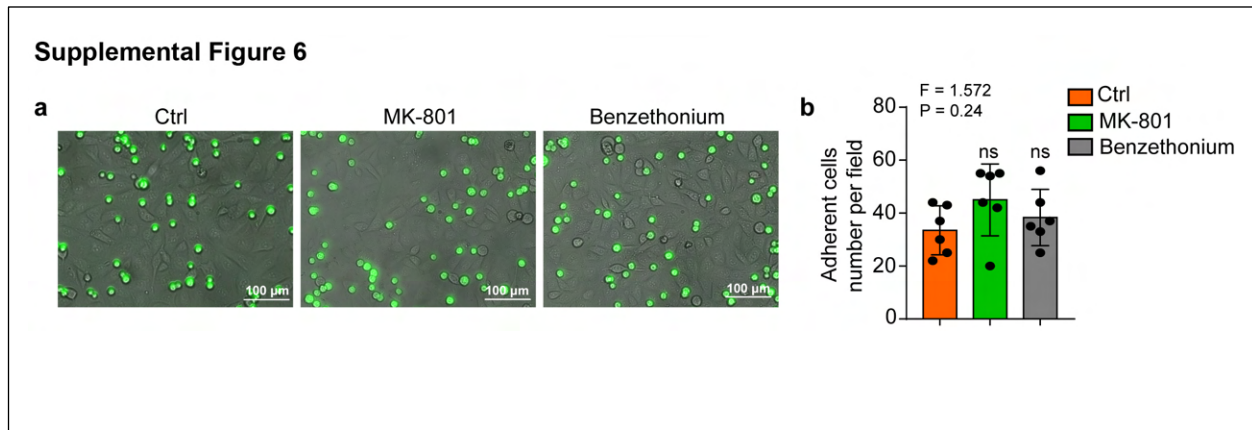

**Supplemental Figure 6. Inhibition of NMDA receptor or acetylcholine receptor does not regulate cell adhesion.**

**a.** Fluorescent micrographs showing adhesion between the HUVEC monolayer and the HCT116 cells (green) treated with control condition, NMDA receptor antagonist MK-801 (500  $\mu$ M) or acetylcholine receptor antagonist benzethonium (10  $\mu$ M) (scale bar = 100  $\mu$ m). **b.** Quantification of the adhesion between HCT116 cells and HUVEC monolayer (N = 6, mean  $\pm$  SD, One-way ANOVA test with post-hoc Bonferroni test, F = 1.572, P = 0.24). Ctrl, control; HUVEC, human umbilical vein endothelial cell.

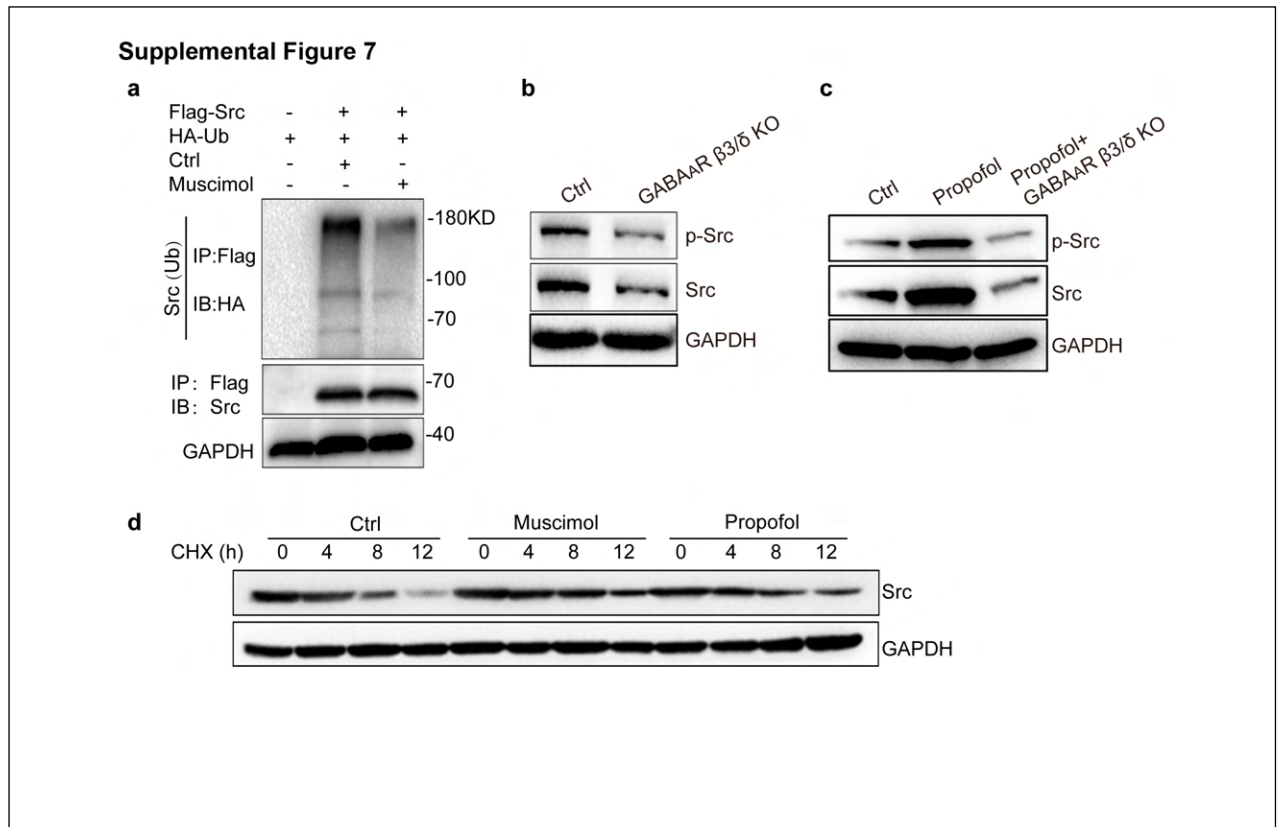

**Supplemental Figure 7. GABA<sub>A</sub>R mediates the propofol regulating expression of Src.**

**a.** Western blot analysis of Src ubiquitylation in HCT116 cells following overexpression of Src-Flag or control vector and treatment with muscimol or control condition. Src was immunoprecipitated with anti-Flag and immunoblotted with anti-HA. **b.** Western blot analysis of Src and p-Src expression in HCT116 cells following knockout of both GABA<sub>A</sub>R subunit  $\beta$ 3 and  $\delta$ . **c.** Western blot analysis of Src and p-Src expression in HCT116 cells (with or without knockout of the GABA<sub>A</sub>R subunit  $\beta$ 3 and  $\delta$ ) treated with propofol. GAPDH is a loading control. **d.** CHX chase assay indicated that the half-life of Src protein was markedly prolonged, by western blot analysis, with the treatment of muscimol or propofol as compared to control conditions. GAPDH is a loading control. Ctrl, control; p-Src, phosphorylated Src; CHX, Cycloheximide.

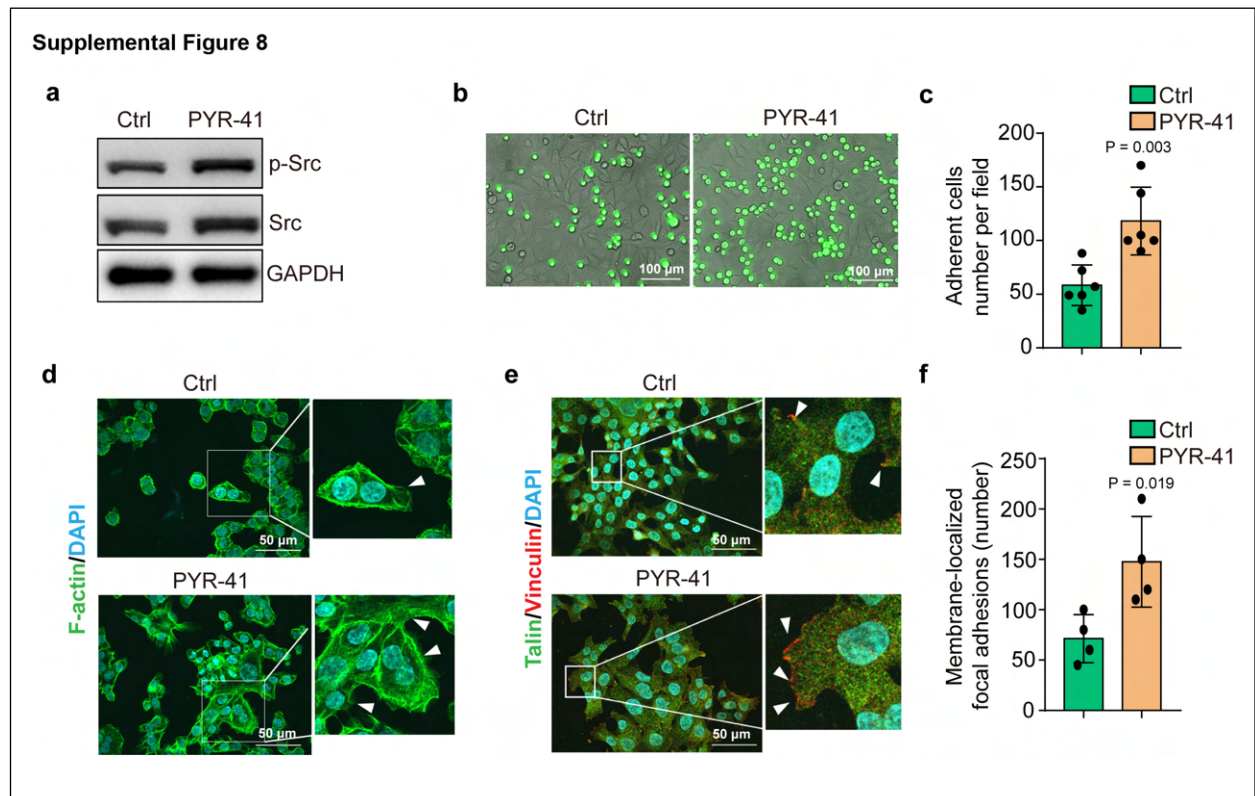

**Supplemental Figure 8. Inhibition of ubiquitylation upregulates Src expression and enhances HCT116 cells adhesion and extension.**

**a.** Western blot analysis of Src and p-Src expression in HCT116 cells treated with E1 enzyme inhibitor PYR-41 or control condition. GAPDH is a loading control. **b.** Fluorescent micrographs showing adhesion of HCT116 cells (green) treated with PYR-41 or control condition to the HUVEC monolayer (scale bar = 100  $\mu$ m). **c.** Quantification of the adhesion between the HUVEC monolayer and the HCT116 cells (N = 6, mean  $\pm$  SD, Student's t-test, P = 0.003). **d.** F-actin labeling of membrane protrusions in HCT116 cells treated with PYR-41 or control condition (scale bar = 50  $\mu$ m). Arrows indicate extensions of cell membrane protrusions. **e.** Immunofluorescence staining of Talin and Vinculin in HCT116 cells treated with PYR-41 or control condition (scale bar = 50  $\mu$ m). Arrows indicate focal adhesions. Ctrl, control. **f.** Quantification of the membrane-localized Talin and Vinculin in focal adhesions (N = 4, mean  $\pm$  SD, Student's t-test, P = 0.019). Ctrl, control; p-Src, phosphorylated Src; HUVEC, human umbilical vein endothelial cell; SD, standard deviation.

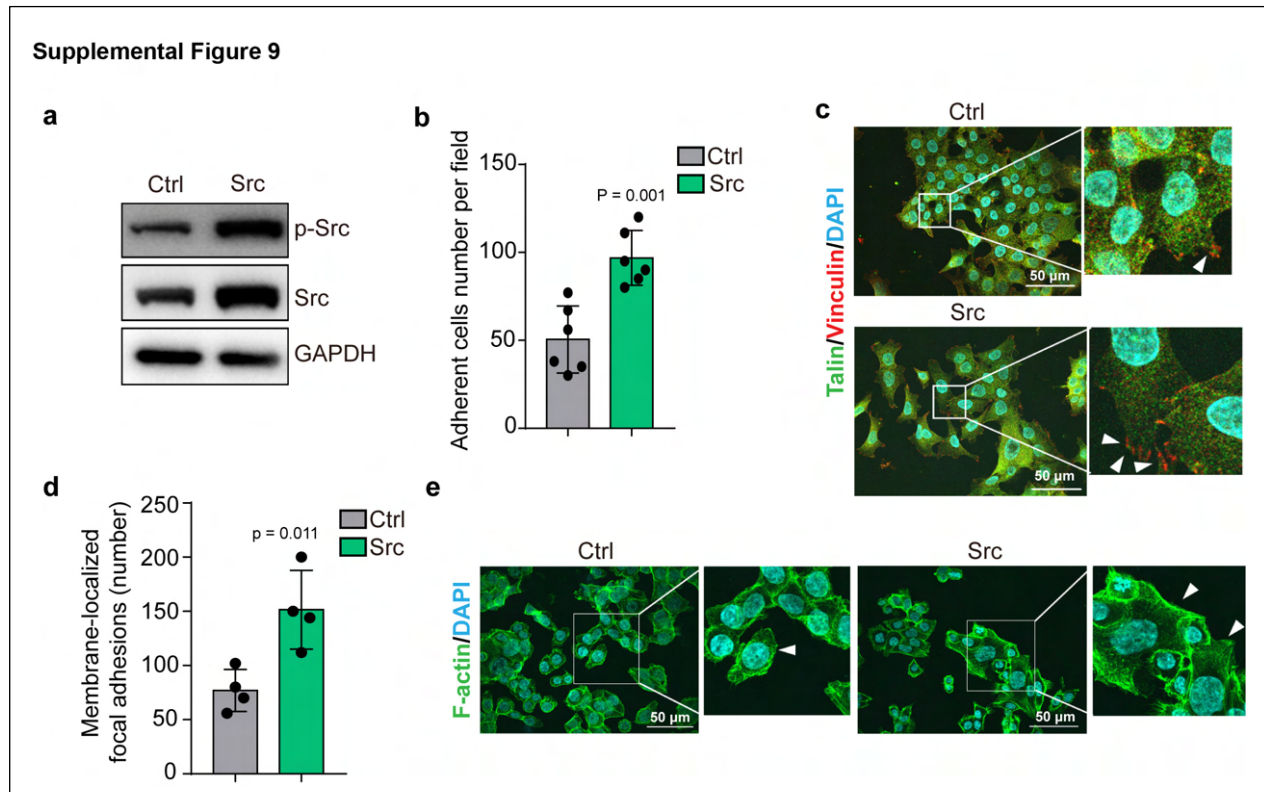

**Supplemental Figure 9. Overexpression of Src promotes HCT116 cell adhesion and extension.**

**a.** Western blot analysis of Src and p-Src expression in HCT116 cells with or without Src overexpression. GAPDH is a loading control. **b.** Quantification of the adhesion between HCT116 cells and HUVEC monolayer ( $N = 6$ , mean  $\pm$  SD, Student's t-test,  $P = 0.001$ ). **c.** Immunofluorescence staining of Talin and Vinculin in HCT116 cells with or without overexpression of Src (scale bar = 50  $\mu\text{m}$ ). Arrows indicate focal adhesions. Ctrl, control. **d.** Quantification of the membrane-localized Talin and Vinculin in focal adhesions ( $N = 4$ , mean  $\pm$  SD, Student's t-test,  $P = 0.011$ ). **e.** F-actin labeling of membrane protrusions in HCT116 cells with or without overexpression of Src (scale bar = 50  $\mu\text{m}$ ). Arrows indicate extensions of cell membrane protrusions. Ctrl, control; p-Src, phosphorylated Src; HUVEC, human umbilical vein endothelial cell; SD, standard deviation.

**Supplemental Figure 10**

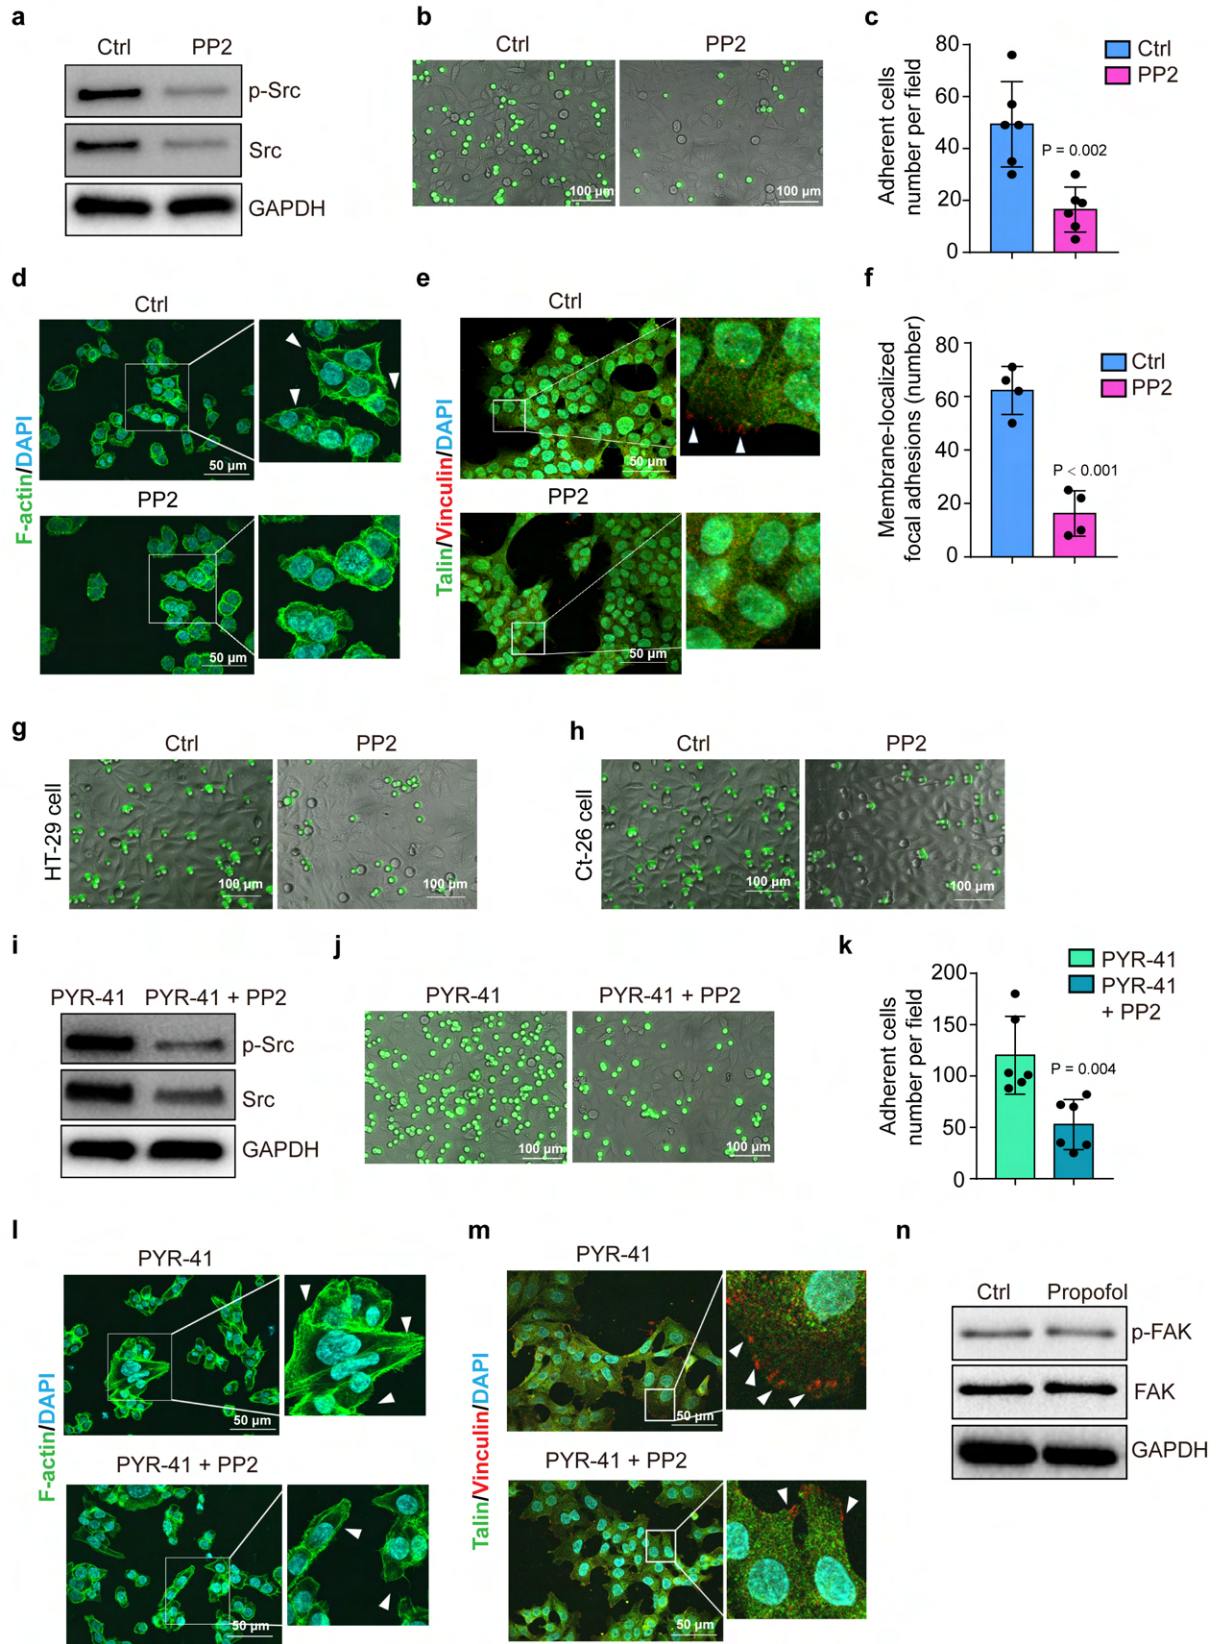

**Supplemental Figure 10. Inhibition of Src attenuates tumor cell adhesion and extension.**

**a.** Western blot analysis of Src and p-Src expression in HCT116 cells treated with Src inhibitor PP2. GAPDH is a loading control. **b.** Fluorescent micrographs demonstrating adhesion between the HUVEC monolayer and the HCT116 cells (green) treated with PP2 or control condition (scale bar = 100  $\mu$ m). **c.** Quantification of the adhesion between HCT116 cells and HUVEC monolayer (N = 6, mean  $\pm$  SD, Student's t-test, P = 0.002). **d.** F-actin labeling of membrane protrusions in HCT116 cells treated with PP2 or control condition (scale bar = 50  $\mu$ m). Arrows indicate extensions of cell membrane protrusions. **e.** Immunofluorescence staining of Talin and Vinculin in HCT116 cells treated with PP2 or control condition (scale bar = 50  $\mu$ m). Arrows indicate focal adhesions. Ctrl, control. **f.** Quantification of the membrane-localized Talin and Vinculin in focal adhesions (N = 4, mean  $\pm$  SD, Student's t-test, P < 0.001). **g.** Fluorescent micrographs demonstrating adhesion between the HUVEC monolayer and the HT-29 cells (green) treated with PP2 or control condition (scale bar = 100  $\mu$ m). **h.** Fluorescent micrographs demonstrating adhesion between the HUVEC monolayer and the CT26 cells (green) treated with PP2 or control condition (scale bar = 100  $\mu$ m). **i.** Western blot analysis of Src and p-Src expression in HCT116 cells treated with PYR-41 and Src inhibitor PP2. GAPDH is a loading control. **j.** Fluorescent micrographs showing adhesion between the HUVEC monolayer and the HCT116 cells (green) treated with PYR-41 and PP2 (scale bar = 100  $\mu$ m). **k.** Quantification of the adhesion between the HUVEC monolayer and the HCT116 cells (N = 6, mean  $\pm$  SD, Student's t-test, P = 0.004). **l.** F-actin labeling of membrane protrusions in HCT116 cells treated with PYR-41 and PP2 (scale bar = 100  $\mu$ m). Arrows indicate extensions of cell membrane protrusions. **m.** Immunofluorescence staining of Talin and Vinculin in HCT116 cells treated with PYR-41 and PP2 (scale bar = 50  $\mu$ m). Arrows indicate focal adhesions. **n.** Western blot analysis of p-FAK expression in HCT116 cells treated with propofol or control condition. GAPDH is a loading control. Ctrl, control; p-Src, phosphorylated Src; HUVEC, human umbilical vein endothelial cell; SD, standard deviation.

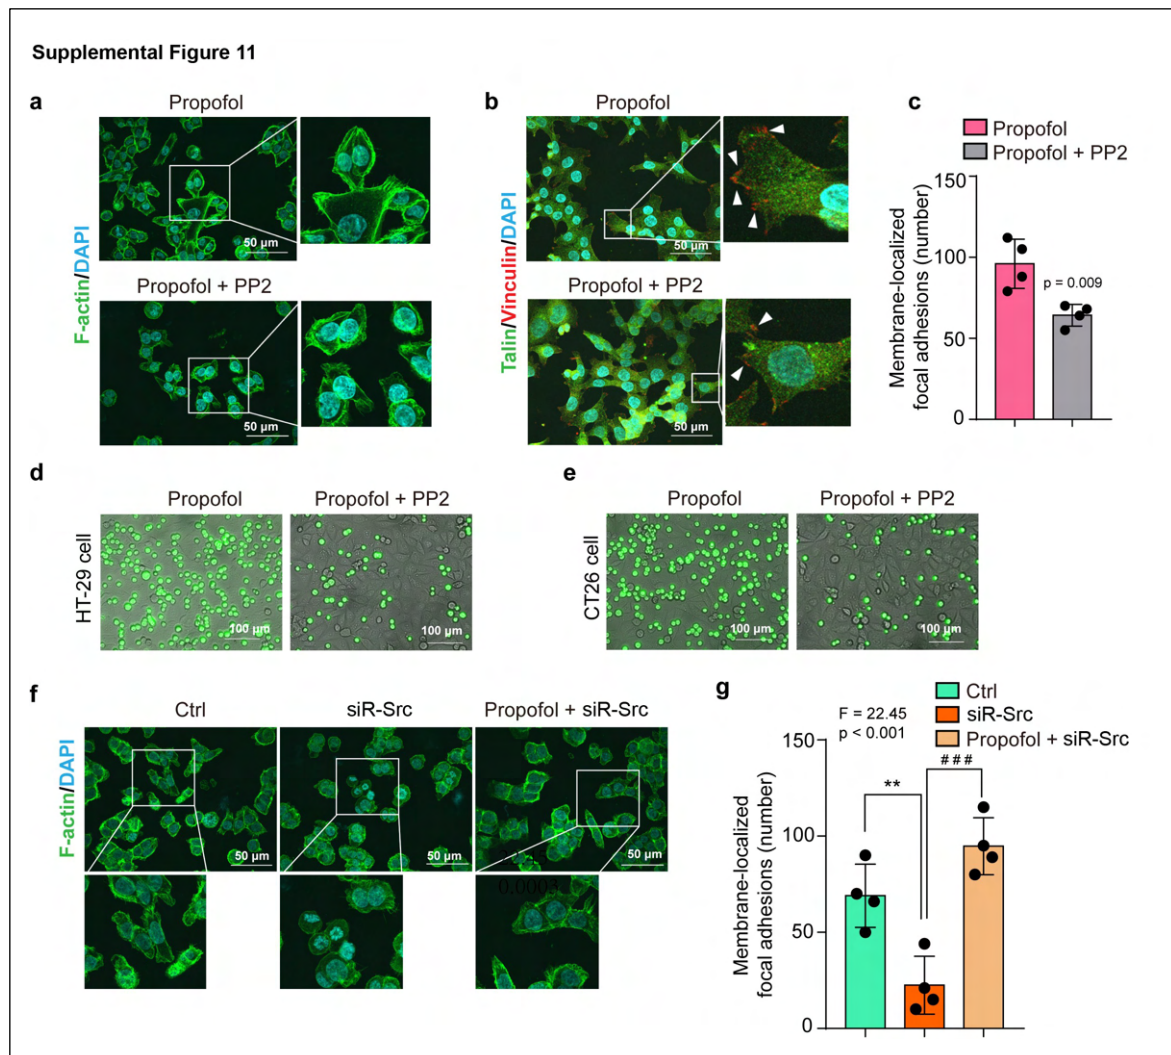

**Supplemental Figure 11. Src mediates the propofol-promoted adhesion and extension in HCT116 cells.**

**a.** F-actin labeling of membrane protrusions in propofol-treated HCT116 cells with or without PP2 treatment (scale bar = 50  $\mu$ m). **b.** Immunofluorescence staining of Talin and Vinculin in propofol-treated HCT116 cells with or without PP2 treatment (scale bar = 50  $\mu$ m). Arrows indicate focal adhesions. **c.** Quantification of the membrane-localized Talin and Vinculin in focal adhesions (N = 4, mean  $\pm$  SD, Student's t-test, P = 0.009). **d.** Fluorescent micrographs demonstrating adhesion between the HUVEC monolayer and the propofol-treated HT-29 cells (green) with or without PP2 treatment (scale bar = 100  $\mu$ m). **e.** Fluorescent micrographs demonstrating adhesion between the HUVEC monolayer and the propofol-treated CT26 cells (green) with or without PP2 treatment (scale bar = 100  $\mu$ m). **f.** F-actin labeling of membrane protrusions in HCT116 cells with knockdown of Src and treated with propofol or control condition (scale bar = 50  $\mu$ m). **g.** Quantification of the membrane-localized Talin and Vinculin in focal adhesions of HCT116 cells (N = 4, mean  $\pm$  SD, One-way ANOVA test with post-hoc Bonferroni test, F = 22.45, P < 0.001). Ctrl, control; p-Src, phosphorylated Src; HUVEC, human umbilical vein endothelial cell; SD, standard deviation. \*\* P < 0.01, ### P < 0.001.



Supplemental Figure 12

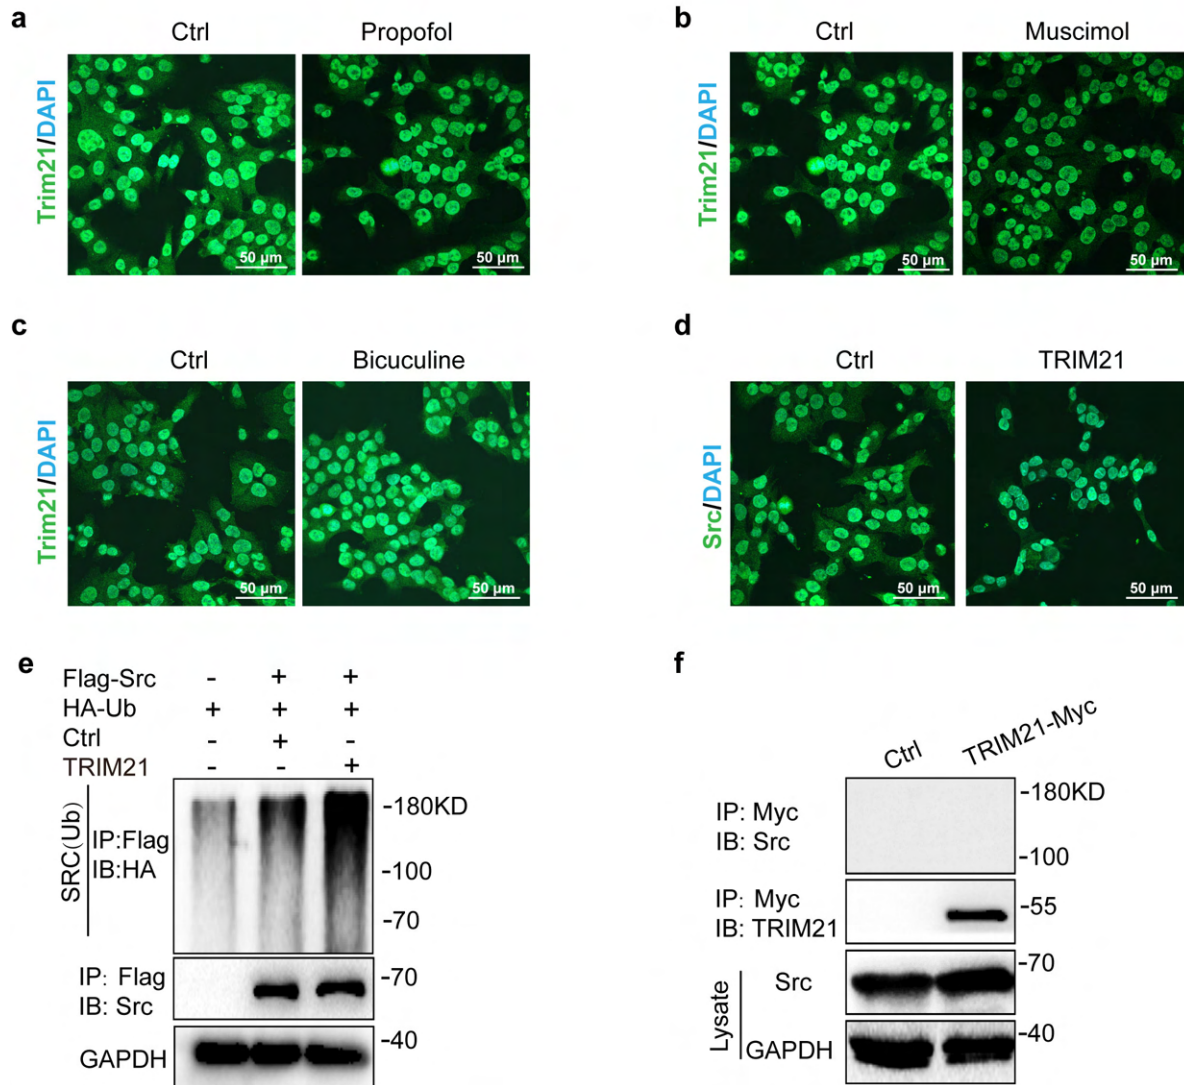

**Supplemental Figure 12. Propofol inhibits ubiquitylation of Src by TRIM21 through GABA<sub>A</sub>R.**

Immunofluorescence staining of TRIM21 in HCT116 cells treated with (a) propofol, (b) muscimol, or (c) bicuculine (scale bar = 50  $\mu$ m). d. Immunofluorescence staining of Src in HCT116 cells with overexpression of TRIM21 (scale bar = 50  $\mu$ m). Ctrl, control. e. Western blot analysis of Src ubiquitylation in HCT116 cells overexpressing Src-Flag, TRIM21, or control vector. Src was immunoprecipitated with anti-Flag and immunoblotted with anti-HA. f. Co-IP assay did not demonstrate the direct interaction between E3 ligase-TRIM21 and Src. GAPDH is a loading control. Ctrl, control.

Supplemental Figure 13

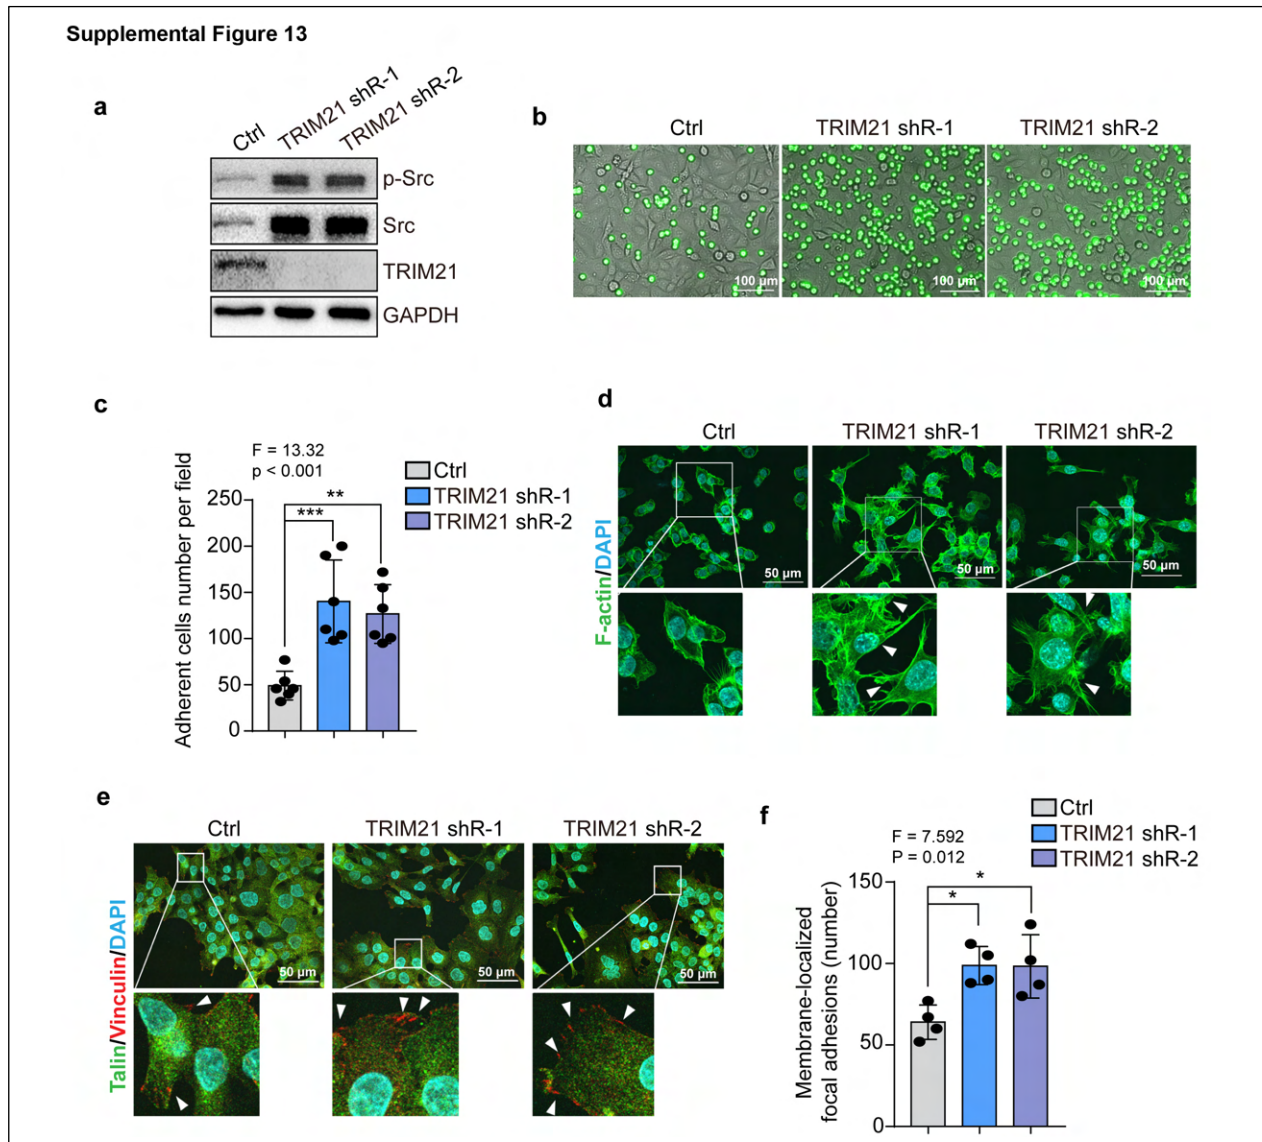

**Supplemental Figure 13. RNAi knockdown of TRIM21 enhances adhesion and extension in HCT116 cells.**

**a.** Western blot analysis of Src and p-Src expression following RNAi knockdown of TRIM21. GAPDH is a loading control. **b.** Fluorescent micrographs showing the adhesion between the HUVEC monolayer and the HCT116 cells with and without knockdown of TRIM21 (green) (scale bar = 100  $\mu$ m). **c.** Quantification of the adhesion between HCT116 cells and HUVEC monolayer (N = 6, mean  $\pm$  SD, One-way ANOVA test with post-hoc Bonferroni test, F = 13.32, P < 0.001). **d.** F-actin labeling of membrane protrusions in HCT116 cells following RNAi knockdown of TRIM21 (scale bar = 50  $\mu$ m). Arrows indicate extensions of cell membrane protrusions. **e.** Immunofluorescence staining of Talin and Vinculin in HCT116 cells with or without knockdown of TRIM21 (scale bar = 50  $\mu$ m). Arrows indicate focal adhesions. Ctrl, control. **f.** Quantification of the membrane-localized Talin and Vinculin in focal adhesions (N = 4, mean  $\pm$  SD, One-way ANOVA test with post-hoc Bonferroni test, F = 7.592, P = 0.012). Ctrl, control; p-Src, phosphorylated Src; HUVEC, human umbilical vein endothelial cell; SD, standard deviation. \* P < 0.05, \*\* P < 0.01, \*\*\* P < 0.001.

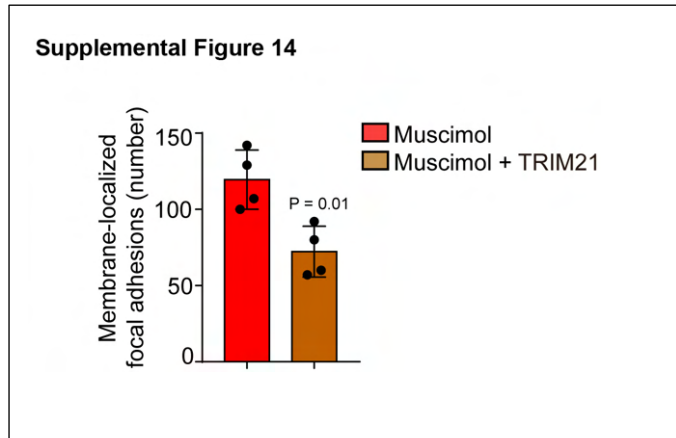

**Supplemental Figure 14. Overexpression of TRIM21 attenuates the muscimol-induced enhancement of HCT116 cells adhesion and extension.**

Quantification of the membrane-localized Talin and Vinculin in focal adhesions (N = 4, mean  $\pm$  SD, Student's t-test, P = 0.01). SD, standard deviation.
